# Supplementary material for: A magnesium MOF as a sensitive fluorescence sensor for CS2 and nitroaromatic compounds
Source: Royal Society of Chemistry journal article supplement (doi:10.1039/c3ta15071b), 2014-01-01
Supplement: c3ta15071b1.pdf [file c3ta15071b1.pdf]

## Supporting Information

# A magnesium MOF as highly selective fluorescence sensor for CS<sub>2</sub> and nitroaromatic compounds

Zhao-Feng Wu,<sup>a,b</sup> Bin Tan,<sup>a,b</sup> Mei-Ling Feng,<sup>a</sup> An-Jian Lan<sup>a,\*</sup> and Xiao-Ying Huang<sup>a,\*</sup>

<sup>a</sup> State Key Laboratory of Structural Chemistry, Fujian Institute of Research on the Structure of Matter, the Chinese Academy of Sciences, Fuzhou, Fujian 350002, P.R. China.

<sup>b</sup> University of the Chinese Academy of Sciences, Beijing 100049, P.R. China.

Fax: +86 591 83793727; Tel: +86 591 83793727; E-mail: [xyhuang@fjirsm.ac.cn](mailto:xyhuang@fjirsm.ac.cn)

**Table S1.** Selected bond lengths (Å) and angles (°) for compound **1<sup>a</sup>**.

|                     |            |                     |            |
|---------------------|------------|---------------------|------------|
| Mg(1)-O(9)          | 2.0195(15) | Mg(2)-O(9)          | 2.0859(15) |
| Mg(1)-O(10)         | 2.0352(18) | Mg(2)-O(11)         | 2.1033(17) |
| Mg(1)-O(1)          | 2.0400(16) | Mg(2)-O(5)          | 2.1310(15) |
| Mg(1)-O(6)#1        | 2.0543(16) | Mg(2)-Mg(3)         | 3.1523(7)  |
| Mg(1)-O(7)#2        | 2.1678(15) | Mg(3)-O(3)#3        | 2.0501(14) |
| Mg(1)-O(8)#2        | 2.2604(15) | Mg(3)-O(3)#5        | 2.0501(14) |
| Mg(1)-C(10)#2       | 2.550(2)   | Mg(3)-O(9)          | 2.0812(13) |
| Mg(1)-Mg(3)         | 3.5147(7)  | Mg(3)-O(9)#1        | 2.0812(13) |
| Mg(1)-Mg(2)         | 3.5275(10) | Mg(3)-O(5)          | 2.1302(13) |
| Mg(2)-O(4)#3        | 2.0423(16) | Mg(3)-O(5)#1        | 2.1302(13) |
| Mg(2)-O(8)#4        | 2.0617(15) | Mg(3)-Mg(2)#1       | 3.1523(7)  |
| Mg(2)-O(2)          | 2.0635(16) | Mg(3)-Mg(1)#1       | 3.5147(7)  |
| O(9)-Mg(1)-O(10)    | 113.54(7)  | O(2)-Mg(2)-O(11)    | 89.32(7)   |
| O(9)-Mg(1)-O(1)     | 97.70(6)   | O(9)-Mg(2)-O(11)    | 170.92(7)  |
| O(10)-Mg(1)-O(1)    | 86.19(7)   | O(4)#3-Mg(2)-O(5)   | 90.77(6)   |
| O(9)-Mg(1)-O(6)#1   | 96.60(6)   | O(8)#4-Mg(2)-O(5)   | 83.80(6)   |
| O(10)-Mg(1)-O(6)#1  | 85.15(8)   | O(2)-Mg(2)-O(5)     | 173.30(7)  |
| O(1)-Mg(1)-O(6)#1   | 165.33(7)  | O(9)-Mg(2)-O(5)     | 79.63(5)   |
| O(9)-Mg(1)-O(7)#2   | 151.19(7)  | O(11)-Mg(2)-O(5)    | 95.46(7)   |
| O(10)-Mg(1)-O(7)#2  | 95.21(7)   | O(3)#3-Mg(3)-O(3)#5 | 180.00(9)  |
| O(1)-Mg(1)-O(7)#2   | 85.54(6)   | O(3)#3-Mg(3)-O(9)   | 90.46(5)   |
| O(6)#1-Mg(1)-O(7)#2 | 83.49(6)   | O(3)#5-Mg(3)-O(9)   | 89.54(5)   |
| O(9)-Mg(1)-O(8)#2   | 92.30(6)   | O(3)#3-Mg(3)-O(9)#1 | 89.54(5)   |
| O(10)-Mg(1)-O(8)#2  | 154.14(7)  | O(3)#5-Mg(3)-O(9)#1 | 90.46(5)   |
| O(1)-Mg(1)-O(8)#2   | 89.52(6)   | O(9)-Mg(3)-O(9)#1   | 180.0      |
| O(6)#1-Mg(1)-O(8)#2 | 93.13(6)   | O(3)#3-Mg(3)-O(5)   | 88.52(6)   |
| O(7)#2-Mg(1)-O(8)#2 | 59.01(5)   | O(3)#5-Mg(3)-O(5)   | 91.48(6)   |
| O(4)#3-Mg(2)-O(8)#4 | 170.08(7)  | O(9)-Mg(3)-O(5)     | 79.76(5)   |
| O(4)#3-Mg(2)-O(2)   | 94.54(7)   | O(9)#1-Mg(3)-O(5)   | 100.24(5)  |
| O(8)#4-Mg(2)-O(2)   | 91.52(6)   | O(3)#3-Mg(3)-O(5)#1 | 91.48(6)   |
| O(4)#3-Mg(2)-O(9)   | 90.20(6)   | O(3)#5-Mg(3)-O(5)#1 | 88.52(6)   |
| O(8)#4-Mg(2)-O(9)   | 96.96(6)   | O(9)-Mg(3)-O(5)#1   | 100.24(5)  |
| O(2)-Mg(2)-O(9)     | 96.24(6)   | O(9)#1-Mg(3)-O(5)#1 | 79.76(5)   |
| O(4)#3-Mg(2)-O(11)  | 82.19(7)   | O(5)-Mg(3)-O(5)#1   | 180.0      |

O(8)#4-Mg(2)-O(11) 90.04(7)

Symmetry transformations used to generate equivalent atoms: #1 -x+1,-y,-z+1; #2 x-1, y, z+1; #3 x+1, y, z; #4 -x+1,-y,-z; #5 -x,-y,-z+1; #6 x-1,y,z; #7 x+1, y, z-1; #8 -x-1,-y+1,-z+1; #9 -x,-y+1,-z+2.

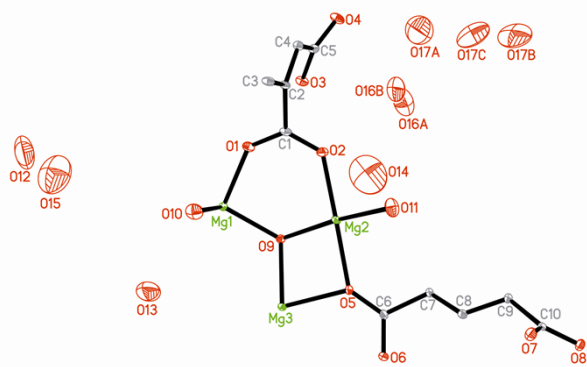

Fig. S1 ORTEP of the asymmetric unit of **1** (30% probability level).

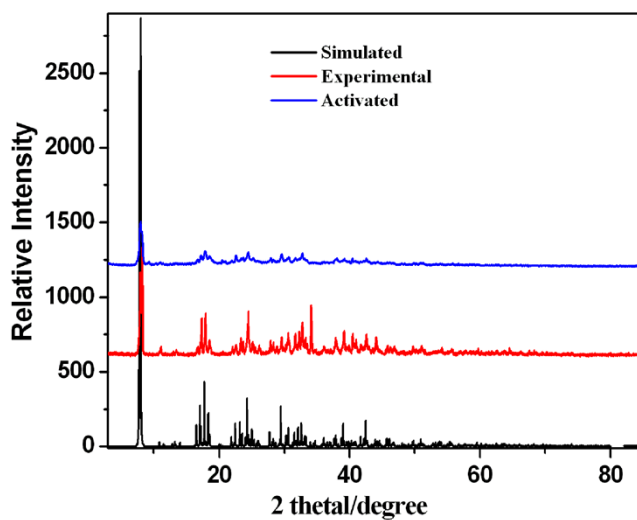

Fig. S2 The PXRD pattern of compound **1** is comparable to the simulated from the single crystal X-ray data and after activated at 100°C for 5h, respectively.

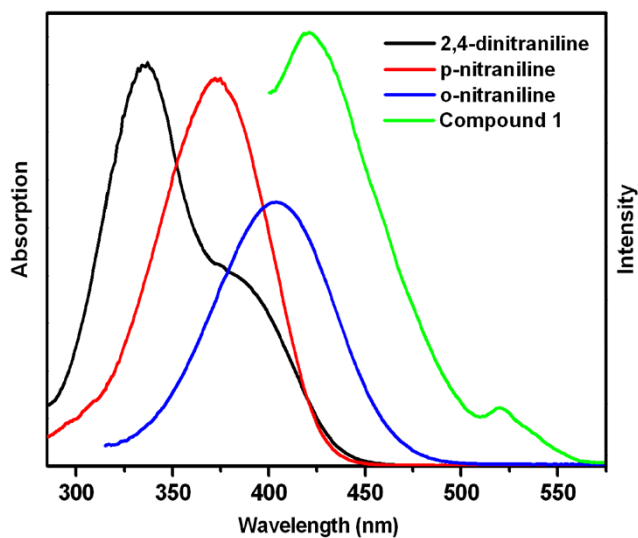

Fig. S3 PL emission spectrum of **1** and absorption spectra of 2,4-dinitraniline, O- and p-nitraniline in  $\text{CH}_3\text{CH}_2\text{OH}$  ( $1 \times 10^{-5}$  M).

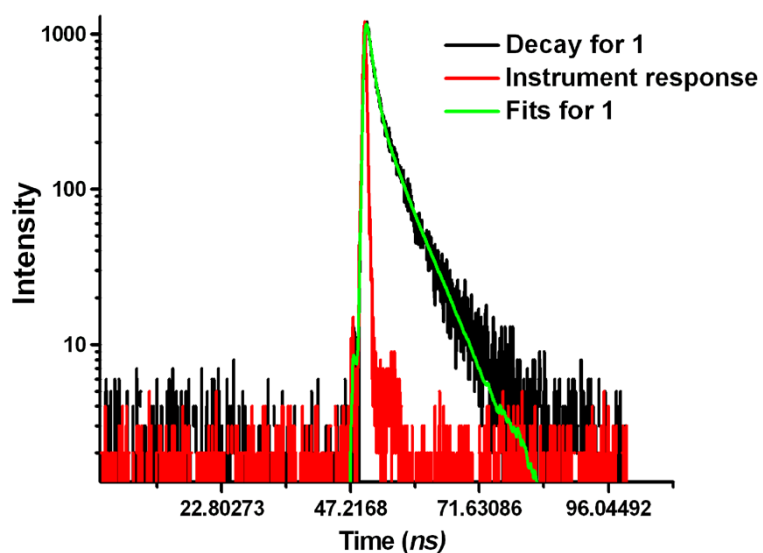

Fig. S4 The decay curve of compound 1.

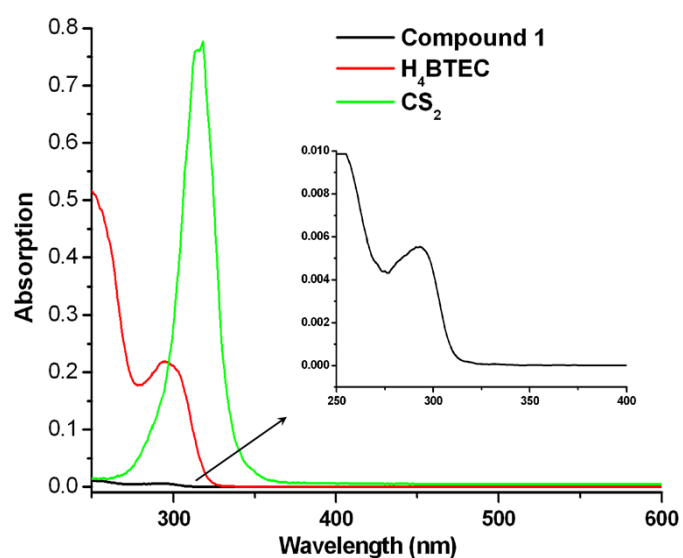

Fig. S5 Absorption spectra of compound 1, H<sub>4</sub>BTEC ligand and CS<sub>2</sub> in CH<sub>3</sub>CH<sub>2</sub>OH ( $1 \times 10^{-5}$  M).

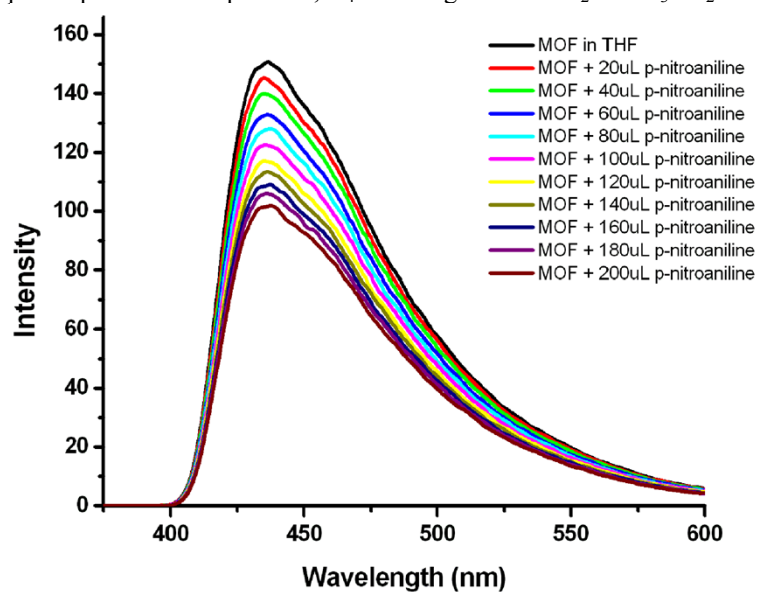

Fig. S6 PL spectra of compound 1 dispersed in THF by gradual addition of  $10^{-3}$  M solution of p-nitraniline in ethanol.

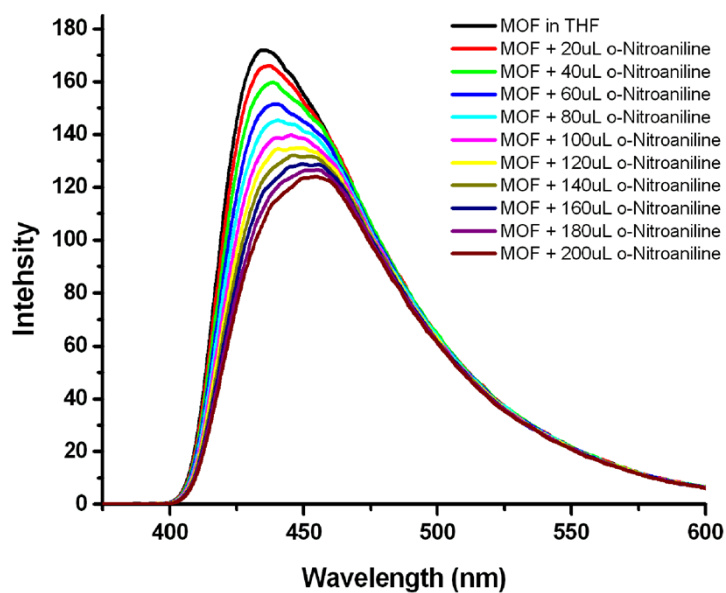

Fig. S7 PL spectra of compound **1** dispersed in THF by gradual addition of  $10^{-3}$  M solution of o-nitraniline in ethanol.

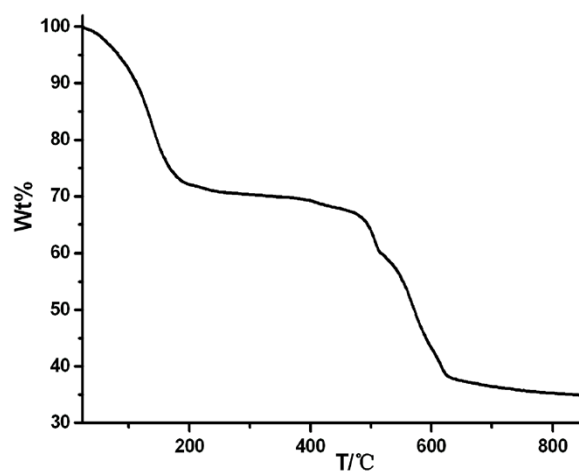

Fig. S8 TGA curves of compound **1**.

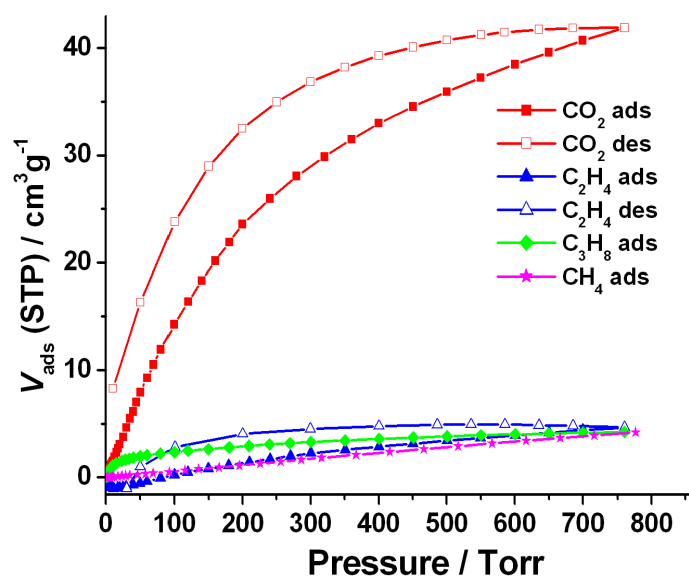

Fig. S9 The  $\text{CO}_2$ ,  $\text{CH}_4$ ,  $\text{C}_2\text{H}_4$  and  $\text{C}_3\text{H}_8$  adsorption isotherms of **1'** at room temperature.

## Gas adsorption

As a good candidate for gas storage, the Mg-MOFs could provide a boost in reaching the mass percentage (wt%) of gas storage targets because of the lower density compared to the MOFs based on transition-metals.<sup>1</sup> Hence we investigated the gas adsorption behaviour of compound **1**. In the TG curve of **1** (Fig. S8), the first weight loss of 28.5% at about 220 °C corresponds to the loss of guest water molecules (calcd: 28.5%, corresponding to the solvent water molecules) and the BTEC ligand decomposes after 500 °C. In order to remove the guest water molecules, compound **1** was activated at 100 °C under vacuum. The activated one (**1'**) has a high degree of crystallinity evidenced by the PXRD characterization (Fig. S2), which indicates the rigid framework of compound **1** still maintained. Gas adsorption measurements show that the CO<sub>2</sub> adsorption of **1'** exhibits the adsorption of 41.9 cm<sup>3</sup>·g<sup>-1</sup> at 298.15 K and 1 atm (Fig. S9). In the same measurement conditions, while for other energy gases such as CH<sub>4</sub>, C<sub>2</sub>H<sub>4</sub> and C<sub>3</sub>H<sub>8</sub>, **1'** shows almost no adsorption behaviour. Compared to the former reported Mg-MOFs for CO<sub>2</sub> adsorption at lower 77K or 87K,<sup>2</sup> **1'** could selectively separate CO<sub>2</sub> from the energy gases at room temperature which may have the purification effects.

## references

1 (a) D. Britt, H. Furukawa, B. Wang, T. G. Glover and O. M. Yaghi, *PNAS*, 2009, **106**, 20637; (b) M. Dinca and J. R. Long, *J. Am. Chem. Soc.*, 2005, 127, 9376; c) Y. P. He, Y. X. Tan and J. Zhang, *Cryst. Growth Des.* 2013, 13, 6.

2 Y. E. Cheon, J. Park and M. P. Suh, *Chem. Commun.* 2009, 5436.
